# Supplementary material for: Genetic studies of accelerometer-based sleep measures yield new insights into human sleep behaviour
Source: Nat Commun. 2019 Apr 5;10:1585. doi: 10.1038/s41467-019-09576-1 (PMC6451011; doi:10.1038/s41467-019-09576-1)
Supplement: Supplementary file 7 — Supplementary Data 4 [file 41467_2019_9576_MOESM7_ESM.xlsx]

## Sheet: Supp Data 4
Supplementary Data 4. Association result cross-tabulation against other traits for the 47 SNPs representing genetic associations reaching P<5x10-8 in UK Biobank. Cross-tabulation also includes results based on the latest self-report chronotype meta-analyses (Jones et al., Nat. Commun. 2019; doi.org/10.1038/s41467-018-08259-7), self-report insomnia GWAS (Lane et al., Nature Genet. 2019; doi.org/10…
													L5 timing (raw scale)				L5 timing (inverse-normalised)				M10 timing (raw scale)				M10 timing (inverse-normalised)				Sleep duration (raw scale)				Sleep duration (inverse-normalised)				Sleep duration SD (raw scale)				Sleep duration SD (inverse-normalised)				Sleep midpoint (raw scale)				Sleep midpoint (inverse-normalised)
TRAIT	SNP	CHR	BP	EFFECT ALLELE	OTHER ALLELE	A1FREQ	INFO	BETA	SE	P_BOLT_LMM	HWE_P	N	Beta	SE	P	N	Beta	SE	P	N	Beta	SE	P	N	Beta	SE	P	N	Beta	SE	P	N	Beta	SE	P	N	Beta	SE	P	N	Beta	SE	P	N	Beta	SE	P	N	Beta
L5 timing	rs1144566	1	182569626	C	T	0.969972	1	0.0964431	0.0140056	7.8e-12	0.930025	85205	0.0944888	0.014884	2.9e-10	85205	0.0964431	0.0140056	7.8e-12	85205	0.0506435	0.016908	0.0026	85670	0.0450432	0.0139285	0.0012	85670	0.00826111	0.0118906	0.48	85449	0.0114855	0.0138043	0.4	85449	0.00971838	0.00841008	0.25	84441	0.0105611	0.0141004	0.46	84441	0.0258864	0.00732292	0.00044	84810	0.0523255
L5 timing	rs113851554	2	66750564	T	G	0.056662	0.925487	0.133438	0.0107206	1.6e-35	0.749114	85205	0.136593	0.0113944	4.4e-33	85205	0.133438	0.0107206	1.6e-35	85205	0.0299905	0.0129504	0.022	85670	0.0241704	0.0106681	0.024	85670	-0.097797	0.00911625	9.1e-27	85449	-0.110302	0.0105835	2.3e-25	85449	0.00740653	0.00645205	0.25	84441	0.0190714	0.0108189	0.085	84441	0.021622	0.00560824	0.00011	84810	0.0423724
L5 timing	rs12991815	2	68071990	C	G	0.42353	0.995287	0.0291601	0.00484196	2.4e-09	0.0613103	85205	0.0307622	0.00514629	3.1e-09	85205	0.0291601	0.00484196	2.4e-09	85205	0.00789395	0.00585081	0.18	85670	0.0055189	0.00481969	0.26	85670	-0.0142034	0.00411613	0.0005	85449	-0.015568	0.00477864	0.00099	85449	0.00479458	0.0029128	0.1	84441	0.010617	0.00488423	0.031	84441	0.00534706	0.00253214	0.035	84810	0.0107351
L5 timing	rs9369062	6	38437303	A	C	0.70797	0.998674	0.0393416	0.00527256	8.5e-14	0.686526	85205	0.0394739	0.00560318	2e-12	85205	0.0393416	0.00527256	8.5e-14	85205	0.00465856	0.00636846	0.47	85670	0.00393728	0.00524614	0.45	85670	-0.0283172	0.00448145	2e-10	85449	-0.0328869	0.00520319	1.9e-10	85449	-0.000746626	0.00316836	0.81	84441	0.000589612	0.00531248	0.92	84441	0.00478053	0.00275632	0.089	84810	0.00945006
L5 timing	rs4882315	12	38458906	T	C	0.506571	0.994216	0.0270842	0.0048109	1.8e-08	0.0851616	85205	0.0284155	0.0051125	2.5e-08	85205	0.0270842	0.0048109	1.8e-08	85205	0.0258284	0.00581086	8.8e-06	85670	0.0220362	0.0047871	4.2e-06	85670	0.00292697	0.00409018	0.53	85449	0.0029924	0.00474915	0.59	85449	0.00249843	0.00289062	0.38	84441	0.0016538	0.00484705	0.73	84441	0.0102247	0.00251469	5.3e-05	84810	0.01978
L5 timing	rs12927162	16	52684916	G	A	0.277484	1	0.0292654	0.00532066	3.3e-08	0.819994	85205	0.0316038	0.00565417	2.1e-08	85205	0.0292654	0.00532066	3.3e-08	85205	0.0209448	0.00642553	0.0011	85670	0.0172863	0.0052935	0.001	85670	-0.0141364	0.00452179	0.0019	85449	-0.0167828	0.00524975	0.0015	85449	0.00267358	0.00319721	0.4	84441	0.00182456	0.0053609	0.71	84441	0.0144541	0.0027807	1.8e-07	84810	0.0269227
M10 timing	rs1973293	12	38679575	C	T	0.480593	0.994627	0.0291072	0.00478	1.1e-09	0.475235	85670	0.022937	0.00510459	7e-06	85205	0.0222716	0.00480345	3.7e-06	85205	0.0344842	0.00580224	2.7e-09	85670	0.0291072	0.00478	1.1e-09	85670	-0.00438814	0.00408372	0.24	85449	-0.00561968	0.00474165	0.2	85449	0.00443964	0.0028859	0.12	84441	0.00452053	0.00483913	0.35	84441	0.00978435	0.00251064	9.6e-05	84810	0.0191681
Sleep duration	rs2660302	1	98520219	A	T	0.811379	0.98094	0.0414559	0.00605419	8.5e-12	0.173505	85449	-0.0034049	0.00652404	0.65	85205	-0.00159708	0.00613903	0.86	85205	0.00329815	0.0074184	0.65	85670	0.00302575	0.00611117	0.62	85670	0.0353505	0.00521491	1.3e-11	85449	0.0414559	0.00605419	8.5e-12	85449	-0.00188471	0.00369039	0.61	84441	-0.00610105	0.00618734	0.32	84441	-0.0077422	0.00320949	0.016	84810	-0.0145185
Sleep duration	rs113851554	2	66750564	G	T	0.943355	0.925487	0.110302	0.0105835	2.3e-25	0.749114	85449	-0.136593	0.0113944	4.4e-33	85205	-0.133438	0.0107206	1.6e-35	85205	-0.0299905	0.0129504	0.022	85670	-0.0241704	0.0106681	0.024	85670	0.097797	0.00911625	9.1e-27	85449	0.110302	0.0105835	2.3e-25	85449	-0.00740653	0.00645205	0.25	84441	-0.0190714	0.0108189	0.085	84441	-0.021622	0.00560824	0.00011	84810	-0.0423724
Sleep duration	rs62158170	2	114082175	G	A	0.216595	0.99067	0.0541768	0.00574107	3.3e-21	0.902546	85449	0.0115404	0.00618281	0.061	85205	0.0106013	0.00581718	0.064	85205	0.00897389	0.00702982	0.2	85670	0.00803088	0.00579092	0.16	85670	0.0454268	0.00494514	4e-20	85449	0.0541768	0.00574107	3.3e-21	85449	-0.00202918	0.00349834	0.56	84441	-0.000604201	0.00586606	0.92	84441	-0.00263848	0.00304143	0.42	84810	-0.00479458
Sleep duration	rs17400325	2	178565913	T	C	0.957922	1	0.0659246	0.0117404	1.5e-08	0.809892	85449	-0.0331657	0.0126238	0.0093	85205	-0.0355443	0.0118773	0.003	85205	-0.0133763	0.0143748	0.35	85670	-0.00900313	0.0118414	0.45	85670	0.0583028	0.0101127	6.1e-09	85449	0.0659246	0.0117404	1.5e-08	85449	-0.0215916	0.00714953	0.0026	84441	-0.0293456	0.0119884	0.014	84441	-0.0047918	0.00621226	0.45	84810	-0.00896092
Sleep duration	rs72828540	6	19102286	T	C	0.751737	0.991963	0.0407969	0.0054722	9.6e-14	0.867373	85449	0.0030097	0.00589416	0.58	85205	0.00279875	0.00554637	0.6	85205	0.00147855	0.00669922	0.82	85670	0.0015848	0.00551861	0.76	85670	0.0341498	0.00471315	4.3e-13	85449	0.0407969	0.0054722	9.6e-14	85449	-0.00453673	0.00333332	0.18	84441	-0.00995985	0.00558907	0.081	84441	0.00116579	0.00289918	0.68	84810	0.00242629
Sleep duration	rs9369062	6	38437303	C	A	0.292192	0.998674	0.0328869	0.00520319	1.9e-10	0.686526	85449	-0.0394739	0.00560318	2e-12	85205	-0.0393416	0.00527256	8.5e-14	85205	-0.00465856	0.00636846	0.47	85670	-0.00393728	0.00524614	0.45	85670	0.0283172	0.00448145	2e-10	85449	0.0328869	0.00520319	1.9e-10	85449	0.000746626	0.00316836	0.81	84441	-0.000589612	0.00531248	0.92	84441	-0.00478053	0.00275632	0.089	84810	-0.00945006
Sleep duration	rs2975734	8	10090097	C	G	0.561335	0.981735	0.0270489	0.0047906	1.3e-08	0.0654896	85449	-0.00397537	0.00515998	0.42	85205	-0.00345862	0.00485554	0.47	85205	0.00314208	0.0058624	0.6	85670	0.00276146	0.00482948	0.58	85670	0.0219289	0.00412615	8.7e-08	85449	0.0270489	0.0047906	1.3e-08	85449	-0.00416612	0.0029171	0.15	84441	-0.0100982	0.00489126	0.038	84441	-0.009089	0.0025377	0.00032	84810	-0.01674
Sleep duration	rs13282541	8	41723550	C	T	0.738651	1	0.0315751	0.00537988	4.4e-09	0.4392	85449	-0.0113054	0.00579429	0.051	85205	-0.00961226	0.00545243	0.076	85205	-0.00873746	0.0065824	0.19	85670	-0.00529762	0.00542262	0.33	85670	0.0267901	0.0046337	7.5e-09	85449	0.0315751	0.00537988	4.4e-09	85449	-0.00103588	0.00327613	0.75	84441	-0.0024605	0.00549326	0.64	84441	-0.0034384	0.00285028	0.24	84810	-0.00595906
Sleep duration	rs2880370	8	105987057	A	T	0.670187	0.9827	0.0284119	0.00506139	2.2e-08	0.63309	85449	-0.0120254	0.0054505	0.032	85205	-0.0121691	0.00512892	0.021	85205	0.00367868	0.00619344	0.54	85670	0.00314472	0.00510219	0.52	85670	0.0237141	0.00435939	5.8e-08	85449	0.0284119	0.00506139	2.2e-08	85449	-0.000835288	0.00308155	0.78	84441	0.00215768	0.00516699	0.67	84441	-0.00233119	0.0026811	0.41	84810	-0.00491227
Sleep duration	rs800165	12	67645219	C	T	0.342545	0.988075	0.0277448	0.005004	2.5e-08	0.846194	85449	-0.00793341	0.00538678	0.13	85205	-0.00497885	0.005069	0.3	85205	-0.00399564	0.00612325	0.51	85670	-0.00190497	0.00504446	0.7	85670	0.0237632	0.00430967	3.2e-08	85449	0.0277448	0.005004	2.5e-08	85449	-0.000784317	0.00304583	0.79	84441	-0.00330619	0.0051073	0.5	84441	-0.00196821	0.00264973	0.46	84810	-0.00333289
Sleep duration	rs10138240	14	63353479	G	C	0.51406	0.985731	0.0290221	0.00474436	7.2e-10	0.190455	85449	0.0046895	0.00510456	0.36	85205	0.00467073	0.00480356	0.33	85205	0.00179072	0.00580245	0.76	85670	0.00156144	0.00478034	0.74	85670	0.023916	0.00408608	3.6e-09	85449	0.0290221	0.00474436	7.2e-10	85449	-0.00231034	0.00288743	0.42	84441	0.00176604	0.00484154	0.72	84441	-0.00549069	0.00251142	0.029	84810	-0.00986151
Sleep midpoint	rs11892220	2	231691067	T	A	0.339351	0.968645	0.0286293	0.00515614	2.5e-08	0.932817	84810	0.00971944	0.00543779	0.069	85205	0.00870919	0.00511622	0.082	85205	0.0200696	0.00618314	0.0011	85670	0.0155427	0.00509345	0.0021	85670	-0.000156964	0.00435032	0.99	85449	-0.000231406	0.00505052	0.98	85449	-0.00594915	0.00307724	0.052	84441	-0.00946866	0.00515996	0.065	84441	0.014935	0.00267553	2e-08	84810	0.0286293
Sleep efficiency	rs113851554	2	66750564	G	T	0.943385	0.925487	0.101362	0.0105127	4.5e-22	0.749114	84810	-0.136593	0.0113944	4.4e-33	85205	-0.133438	0.0107206	1.6e-35	85205	-0.0299905	0.0129504	0.022	85670	-0.0241704	0.0106681	0.024	85670	0.097797	0.00911625	9.1e-27	85449	0.110302	0.0105835	2.3e-25	85449	-0.00740653	0.00645205	0.25	84441	-0.0190714	0.0108189	0.085	84441	-0.021622	0.00560824	0.00011	84810	-0.0423724
Sleep efficiency	rs62158169	2	114081827	T	C	0.216371	0.989592	0.0319268	0.00570503	2.3e-08	0.870192	84810	0.0112018	0.00618703	0.068	85205	0.0103483	0.00582115	0.071	85205	0.00833619	0.00703465	0.23	85670	0.00747931	0.00579489	0.19	85670	0.0448987	0.0049485	1.2e-19	85449	0.053613	0.00574498	8.9e-21	85449	-0.00181949	0.0035006	0.6	84441	-0.000471509	0.00586986	0.93	84441	-0.00281086	0.00304349	0.38	84810	-0.00509005
Sleep efficiency	rs17400325	2	178565913	T	C	0.957817	1	0.073524	0.0116449	2.2e-10	0.809892	84810	-0.0331657	0.0126238	0.0093	85205	-0.0355443	0.0118773	0.003	85205	-0.0133763	0.0143748	0.35	85670	-0.00900313	0.0118414	0.45	85670	0.0583028	0.0101127	6.1e-09	85449	0.0659246	0.0117404	1.5e-08	85449	-0.0215916	0.00714953	0.0026	84441	-0.0293456	0.0119884	0.014	84441	-0.0047918	0.00621226	0.45	84810	-0.00896092
Sleep efficiency	rs13094687	3	52450043	G	A	0.314827	1	0.0287591	0.00505473	1.3e-08	0.914015	84810	0.00194784	0.00548023	0.74	85205	0.000718374	0.00515666	0.91	85205	0.0115956	0.00622956	0.061	85670	0.00935196	0.00513189	0.065	85670	0.0119426	0.00438301	0.0057	85449	0.0137463	0.00508868	0.006	85449	-0.00191893	0.00309879	0.53	84441	-0.00381814	0.00519552	0.45	84441	0.00361184	0.00269544	0.19	84810	0.00805738
Sleep efficiency	rs13080973	3	138596050	G	A	0.201957	1	0.0323593	0.00583041	3.1e-08	0.289168	84810	-0.0113492	0.00631941	0.071	85205	-0.011889	0.00594629	0.044	85205	-0.0138767	0.0071842	0.053	85670	-0.0122164	0.00591832	0.039	85670	0.0152261	0.00505608	0.0026	85449	0.0186409	0.0058701	0.0015	85449	-0.00954081	0.0035752	0.0077	84441	-0.00955458	0.00599429	0.12	84441	-0.000775061	0.00310908	0.8	84810	-0.00381765
Number of sleep episodes	rs12714404	2	282462	T	G	0.283222	0.994879	0.0369176	0.00517784	1.1e-12	0.659971	84810	0.00769937	0.00565041	0.18	85205	0.0077338	0.00531626	0.15	85205	0.0001574	0.00642482	0.99	85670	-0.00119342	0.00529254	0.81	85670	-0.0174094	0.00452076	9.8e-05	85449	-0.0208525	0.00524839	5.9e-05	85449	0.00284043	0.00319725	0.37	84441	0.00702444	0.00536119	0.19	84441	0.0029134	0.00278026	0.3	84810	0.0049033
Number of sleep episodes	rs310727	3	4336589	T	C	0.474787	0.989144	0.025953	0.00467516	3.2e-08	0.111656	84810	0.00460515	0.00510341	0.37	85205	0.00491957	0.00480209	0.31	85205	-6.02044e-05	0.00580045	0.98	85670	0.00112839	0.00477839	0.83	85670	-0.000632613	0.00408174	0.89	85449	-0.000872101	0.00473889	0.87	85449	-0.00194875	0.00288641	0.49	84441	-0.00374134	0.00483945	0.42	84441	0.00158449	0.00251055	0.53	84810	0.00334244
Number of sleep episodes	rs55754932	3	87847754	C	A	0.283669	0.976349	0.0371275	0.00520613	1.8e-12	0.337278	84810	-0.00378828	0.00568272	0.5	85205	-0.00519317	0.00534719	0.33	85205	-0.00408987	0.00645729	0.53	85670	-0.00290079	0.00531949	0.58	85670	-0.0114138	0.00454383	0.012	85449	-0.0135674	0.00527539	0.011	85449	0.000129516	0.00321464	0.97	84441	0.00412087	0.00538977	0.45	84441	-0.000440015	0.00279559	0.87	84810	-0.000595682
Number of sleep episodes	rs9864672	3	137076353	T	C	0.521921	0.996577	0.0294218	0.00466783	1.6e-10	0.310465	84810	-0.00717225	0.00509504	0.17	85205	-0.00728505	0.00479421	0.13	85205	-0.00369486	0.00579057	0.51	85670	-0.00229815	0.00477025	0.61	85670	0.00127202	0.00407502	0.82	85449	0.0016899	0.0047311	0.78	85449	0.00251862	0.0028825	0.39	84441	0.00424432	0.00483288	0.39	84441	-0.00444964	0.00250662	0.08	84810	-0.00859483
Number of sleep episodes	rs4974697	4	2473092	T	A	0.390115	0.998515	0.0263488	0.00478221	4.7e-08	0.93666	84810	-0.00331732	0.00521854	0.53	85205	-0.00438067	0.00491051	0.38	85205	-0.00631914	0.00593158	0.29	85670	-0.00569023	0.00488664	0.25	85670	0.0119274	0.00417521	0.0042	85449	0.0127096	0.00484764	0.0085	85449	-0.00700055	0.00295111	0.017	84441	-0.00788685	0.00494824	0.11	84441	-0.00101619	0.00256679	0.68	84810	-0.00316337
Number of sleep episodes	rs7377083	4	102708997	A	C	0.429597	0.981024	0.0288867	0.00472986	1.2e-09	0.241277	84810	-0.00200794	0.00515954	0.7	85205	-0.00115353	0.00485499	0.82	85205	-0.00497032	0.0058643	0.41	85670	-0.00441255	0.00483122	0.37	85670	-0.00990001	0.00412945	0.017	85449	-0.011604	0.00479451	0.017	85449	-1.13828e-05	0.00291824	0.99	84441	-0.000678217	0.00489313	0.89	84441	-0.00179973	0.00253873	0.49	84810	-0.00368517
Number of sleep episodes	rs749100	5	63307862	A	G	0.58162	0.996099	0.0325485	0.00472443	8.5e-12	0.949371	84810	0.00955492	0.00515835	0.062	85205	0.00876964	0.00485393	0.069	85205	0.00706608	0.00586055	0.23	85670	0.00564312	0.00482798	0.24	85670	-0.00177207	0.00412483	0.67	85449	-0.00168203	0.00478901	0.73	85449	-0.000231924	0.00291686	0.93	84441	-0.000234895	0.00489106	0.94	84441	0.00115163	0.00253674	0.64	84810	0.00136899
Number of sleep episodes	rs9341399	6	73773644	C	T	0.936442	0.983134	0.0660763	0.00959421	6.4e-12	0.0916399	84810	0.0281461	0.0104643	0.008	85205	0.0266327	0.00984688	0.0077	85205	0.0142949	0.0118944	0.24	85670	0.0155856	0.00979824	0.12	85670	-0.0122186	0.00837384	0.13	85449	-0.0151554	0.00972245	0.11	85449	-0.00916295	0.0059211	0.12	84441	-0.0160454	0.00992808	0.11	84441	-0.00100978	0.00515017	0.83	84810	0.000315897
Number of sleep episodes	rs1889978	6	124771233	C	T	0.485477	0.987458	0.0271059	0.00468514	4.5e-09	0.418011	84810	0.011076	0.00511378	0.028	85205	0.00953983	0.00481204	0.044	85205	0.00437721	0.00581504	0.45	85670	0.00440125	0.00479025	0.36	85670	-0.0072629	0.00409113	0.069	85449	-0.00913333	0.00475001	0.051	85449	-0.000571415	0.00289136	0.85	84441	0.0019757	0.00484803	0.69	84441	0.00594168	0.00251497	0.018	84810	0.0121506
Number of sleep episodes	rs2141277	7	39099178	A	G	0.477521	0.990537	0.0260861	0.00468047	1.4e-08	0.179372	84810	0.00083129	0.00510503	0.91	85205	0.000989847	0.0048037	0.89	85205	5.30865e-05	0.00580374	0.99	85670	0.000980028	0.00478096	0.83	85670	-0.013378	0.0040845	0.001	85449	-0.0150652	0.00474224	0.0015	85449	-0.000155783	0.00288744	0.96	84441	5.38747e-05	0.00484138	0.99	84441	0.00051324	0.00251181	0.83	84810	0.00135121
Number of sleep episodes	rs10233848	7	103122645	G	A	0.293326	0.994774	0.0346429	0.00513443	1.7e-11	0.759625	84810	-0.00677605	0.00560046	0.23	85205	-0.00651422	0.00526988	0.21	85205	-0.00348896	0.00636475	0.58	85670	-0.00465181	0.00524311	0.38	85670	-0.00788759	0.00447962	0.086	85449	-0.00999948	0.00520097	0.061	85449	-0.00107747	0.00316969	0.73	84441	-0.00204444	0.00531464	0.7	84441	-0.005849	0.00275557	0.034	84810	-0.01117
Number of sleep episodes	rs1124116	10	99371147	A	G	0.729507	1	0.0310845	0.00524515	2.1e-09	0.0659294	84810	-0.00188625	0.0057229	0.74	85205	-0.00244741	0.00538544	0.65	85205	0.00190626	0.0065018	0.76	85670	0.00233977	0.00535635	0.66	85670	-0.000301176	0.00457724	0.93	85449	-0.00115049	0.00531453	0.81	85449	-0.00162608	0.00323676	0.61	84441	-0.000118144	0.00542716	0.99	84441	-0.0019884	0.00281436	0.47	84810	-0.0032384
Number of sleep episodes	rs4755731	11	43685168	G	A	0.430884	0.994763	0.0277831	0.00472333	3.3e-09	0.918772	84810	-0.00626087	0.00515201	0.21	85205	-0.00542545	0.00484814	0.24	85205	-0.0029739	0.00585633	0.62	85670	-0.00204943	0.00482466	0.67	85670	0.00479368	0.00412129	0.24	85449	0.0058095	0.00478485	0.22	85449	-0.00227722	0.00291346	0.43	84441	-0.00163841	0.00488529	0.73	84441	-0.00429744	0.00253411	0.092	84810	-0.00821397
Number of sleep episodes	rs3751837	16	3583173	C	T	0.780542	0.991912	0.0333442	0.00565942	3.6e-09	0.891745	84810	-0.00153668	0.00617461	0.84	85205	-0.00117615	0.00581041	0.88	85205	-0.00258669	0.00701659	0.72	85670	-0.00312613	0.00578044	0.6	85670	-0.0152914	0.00493708	0.0019	85449	-0.0181887	0.0057319	0.0015	85449	-0.00293335	0.00349174	0.4	84441	-0.00272678	0.00585474	0.64	84441	0.0035369	0.003037	0.25	84810	0.00551946
Number of sleep episodes	rs8045740	16	20262776	G	T	0.867613	0.94901	0.0524721	0.00704025	6.3e-14	0.791997	84810	-0.00812483	0.00768356	0.27	85205	-0.00840998	0.00723035	0.23	85205	-0.00819701	0.00873322	0.34	85670	-0.00694075	0.00719464	0.33	85670	-0.0131966	0.00614565	0.03	85449	-0.0160377	0.00713505	0.024	85449	-0.0111482	0.00434253	0.01	84441	-0.0168659	0.0072813	0.02	84441	-0.00165209	0.00377812	0.65	84810	-0.00233463
Number of sleep episodes	rs11078917	17	37746359	A	C	0.279116	0.987317	0.0286812	0.00521926	2.7e-08	0.842963	84810	-0.00185894	0.00569115	0.75	85205	-0.00137809	0.00535575	0.81	85205	0.00317209	0.00646596	0.62	85670	0.003675	0.00532682	0.48	85670	-0.0031723	0.00455432	0.46	85449	-0.00347129	0.00528789	0.48	85449	-0.000435258	0.00321813	0.89	84441	-0.000520675	0.00539591	0.91	84441	0.00649136	0.00279952	0.021	84810	0.0120645
Number of sleep episodes	rs11082030	18	35501739	T	C	0.724851	0.987897	0.0298249	0.00524288	7.8e-09	0.756029	84810	0.0163599	0.00571762	0.0042	85205	0.0158524	0.00538038	0.0032	85205	0.0127522	0.00649735	0.051	85670	0.0106766	0.00535298	0.048	85670	-0.0169514	0.00457568	0.00022	85449	-0.019489	0.00531287	0.00026	85449	0.00467329	0.00323298	0.15	84441	0.00997229	0.00542117	0.074	84441	0.00524333	0.00281252	0.068	84810	0.010725
Number of sleep episodes	rs8098424	18	52458218	G	A	0.619471	0.991814	0.0271567	0.00482384	1.2e-08	0.715151	84810	-0.00873503	0.00526027	0.098	85205	-0.00786361	0.00495	0.11	85205	-0.00772149	0.00597828	0.19	85670	-0.00577454	0.00492533	0.24	85670	-0.00650425	0.00421036	0.12	85449	-0.00778381	0.00488869	0.11	85449	-0.00277735	0.00297432	0.35	84441	-0.00339828	0.00498744	0.49	84441	-0.00221325	0.00258792	0.38	84810	-0.0059313
Number of sleep episodes	rs76753486	19	42684264	T	C	0.083563	0.991905	0.0473146	0.00846352	1.9e-08	0.946316	84810	0.0241752	0.0092249	0.0082	85205	0.0217756	0.00868148	0.011	85205	0.0327603	0.0104806	0.0018	85670	0.0255895	0.00863467	0.0031	85670	-0.0237082	0.00738475	0.0014	85449	-0.0280653	0.00857458	0.0011	85449	0.00255886	0.00521686	0.62	84441	-0.0045506	0.00874778	0.61	84441	0.000818094	0.00453887	0.85	84810	-0.0010741
Number of sleep episodes	rs429358	19	45411941	T	C	0.848043	1	0.0356169	0.00651007	3.6e-08	0.497345	84810	0.0298092	0.00709954	2.1e-05	85205	0.0303967	0.00668132	4.2e-06	85205	0.0132911	0.00806655	0.099	85670	0.00929788	0.00664578	0.16	85670	0.0180723	0.0056805	0.0018	85449	0.0228276	0.00659574	0.00068	85449	-0.000958104	0.0040116	0.81	84441	-0.00537854	0.00672678	0.42	84441	0.010781	0.00349128	0.002	84810	0.0210773
Number of sleep episodes	rs12479469	20	61145196	A	G	0.341931	0.955789	0.0314523	0.00501374	4.1e-10	0.561841	84810	-0.0104197	0.0054685	0.06	85205	-0.010952	0.00514608	0.036	85205	-0.000523839	0.00621458	0.93	85670	0.000276589	0.00511973	0.96	85670	-0.00434487	0.00437673	0.31	85449	-0.00511181	0.00508184	0.3	85449	-0.00559144	0.00309094	0.07	84441	-0.00664202	0.00518278	0.2	84441	-0.00270595	0.00268856	0.35	84810	-0.00426776
Diurnal inactivity	rs17805200	9	13764434	C	T	0.272025	1	0.0305887	0.00523094	5.3e-09	0.811813	84757	0.00814521	0.0056964	0.16	85205	0.00778576	0.00536026	0.16	85205	0.0018939	0.00647398	0.77	85670	0.000769526	0.00533333	0.88	85670	0.0091109	0.00455697	0.04	85449	0.0112786	0.00529105	0.029	85449	0.00481794	0.00322265	0.14	84441	0.00893088	0.00540351	0.1	84441	-0.000360275	0.00280309	0.88	84810	1.08332e-05
Diurnal inactivity	rs7155227	14	63365094	T	G	0.522776	0.983614	0.0331976	0.00469206	1.7e-12	0.409643	84757	0.00810898	0.00511114	0.12	85205	0.00787239	0.00480976	0.1	85205	0.00194264	0.00581052	0.74	85670	0.00212614	0.00478699	0.65	85670	0.0221411	0.00409154	4.6e-08	85449	0.027143	0.0047507	7.9e-09	85449	-0.0021027	0.00289083	0.47	84441	0.000709004	0.00484725	0.89	84441	-0.00361211	0.00251453	0.15	84810	-0.00635145
[truncated: 39 more columns]
